# Supplementary material for: Cluster analysis to identify long COVID phenotypes using 129Xe magnetic resonance imaging: a multicentre evaluation
Source: PubMed Central journal article supplement — Eur Respir J. 2024 Mar 28;63(3):2302301. doi: 10.1183/13993003.02301-2023 (PMC10973687; doi:10.1183/13993003.02301-2023), 2024-03-28

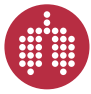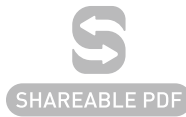

# Cluster analysis to identify long COVID phenotypes using $^{129}\text{Xe}$ magnetic resonance imaging: a multicentre evaluation

Rachel L. Eddy<sup>1,2</sup>, David Mummy<sup>3</sup>, Shuo Zhang<sup>3</sup>, Haoran Dai<sup>4</sup>, Aryil Bechtel<sup>3</sup>, Alexandra Schmidt<sup>1</sup>, Bradie Frizzell<sup>5</sup>, Firoozeh V. Gerayeli<sup>1</sup>, Jonathon A. Leipsic<sup>1,6</sup>, Janice M. Leung<sup>1,2</sup>, Bastiaan Driehuys<sup>3,4,7</sup>, Loretta G. Que<sup>8</sup>, Mario Castro<sup>5</sup>, Don D. Sin<sup>1,2</sup> and Peter J. Niedbalski<sup>5</sup>

<sup>1</sup>Centre for Heart Lung Innovation, St Paul's Hospital, University of British Columbia, Vancouver, BC, Canada. <sup>2</sup>Division of Respiratory Medicine, Department of Medicine, University of British Columbia, Vancouver, BC, Canada. <sup>3</sup>Department of Radiology, Duke University, Durham, NC, USA. <sup>4</sup>Department of Medical Physics, Duke University, Durham, NC, USA. <sup>5</sup>Division of Pulmonary and Critical Care Medicine, University of Kansas Medical Center, Kansas City, KS, USA. <sup>6</sup>Department of Radiology, University of British Columbia, Vancouver, BC, Canada. <sup>7</sup>Department of Biomedical Engineering, Duke University, Durham, NC, USA. <sup>8</sup>Division of Pulmonary, Department of Medicine, Duke University, Durham, NC, USA.

Corresponding author: Peter J. Niedbalski ([pniedbalski@kumc.edu](mailto:pniedbalski@kumc.edu))

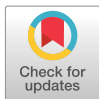

Shareable abstract (@ERSpublications)

Cluster analysis of  $^{129}\text{Xe}$  MRI metrics identifies 4 phenotypes of long COVID with distinct functional MRI and clinical characteristics. MRI-based clusters can be used to dissect long COVID heterogeneity, enabling personalised clinical care and treatment. <https://bit.ly/42uia1J>

Cite this article as: Eddy RL, Mummy D, Zhang S, *et al.* Cluster analysis to identify long COVID phenotypes using  $^{129}\text{Xe}$  magnetic resonance imaging: a multicentre evaluation. *Eur Respir J* 2024; 63: 2302301 [DOI: 10.1183/13993003.02301-2023].

This extracted version can be shared freely online.

Copyright ©The authors 2024.

This version is distributed under the terms of the Creative Commons Attribution Non-Commercial Licence 4.0. For commercial reproduction rights and permissions contact [permissions@ersnet.org](mailto:permissions@ersnet.org)

This article has an editorial commentary:  
<https://doi.org/10.1183/13993003.00381-2024>

Received: 26 Oct 2023  
Accepted: 26 Jan 2024

## Abstract

**Background** Long COVID impacts ~10% of people diagnosed with coronavirus disease 2019 (COVID-19), yet the pathophysiology driving ongoing symptoms is poorly understood. We hypothesised that  $^{129}\text{Xe}$  magnetic resonance imaging (MRI) could identify unique pulmonary phenotypic subgroups of long COVID. Therefore, we evaluated ventilation and gas exchange measurements with cluster analysis to generate imaging-based phenotypes.

**Methods** COVID-negative controls and participants who previously tested positive for COVID-19 underwent  $^{129}\text{Xe}$  MRI ~14 months post-acute infection across three centres. Long COVID was defined as persistent dyspnoea, chest tightness, cough, fatigue, nausea and/or loss of taste/smell at MRI; participants reporting no symptoms were considered fully recovered.  $^{129}\text{Xe}$  MRI ventilation defect percent (VDP) and membrane-to-gas (Mem/Gas), red blood cell-to-membrane (RBC/Mem) and red blood cell-to-gas (RBC/Gas) ratios were used in k-means clustering for long COVID, and measurements were compared using ANOVA with post-hoc Bonferroni correction.

**Results** We evaluated 135 participants across three centres: 28 COVID-negative (mean±SD age 40±16 years), 34 fully recovered (42±14 years) and 73 long COVID (49±13 years). RBC/Mem ( $p=0.03$ ) and forced expiratory volume in 1 s ( $\text{FEV}_1$ ) ( $p=0.04$ ) were different between long COVID and COVID-negative;  $\text{FEV}_1$  and all other pulmonary function tests (PFTs) were within normal ranges. Four unique long COVID clusters were identified compared with recovered and COVID-negative. Cluster 1 was the youngest with normal MRI and mild gas trapping; Cluster 2 was the oldest, characterised by reduced RBC/Mem but normal PFTs; Cluster 3 had mildly increased Mem/Gas with normal PFTs; and Cluster 4 had markedly increased Mem/Gas with concomitant reduction in RBC/Mem and restrictive PFT pattern.

**Conclusions** We identified four  $^{129}\text{Xe}$  MRI long COVID phenotypes with distinct characteristics.  $^{129}\text{Xe}$  MRI can dissect pathophysiological heterogeneity of long COVID to enable personalised patient care.

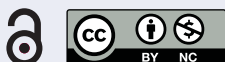

Supplement: ERJ-02301-2023.Shareable.pdf [file ERJ-02301-2023.Shareable.pdf]
